# Supplementary material for: Understanding aerosol–cloud interactions through modeling the development of orographic cumulus congestus during IPHEx
Source: Copernicus journal article supplement (doi:10.5194/acp-19-1413-2019), 2019-02-04
Supplement: Supplementary file 2 [file acp-19-1413-2019-supplement.zip]

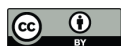

## *Supplement of*

# **Understanding aerosol–cloud interactions through modeling the development of orographic cumulus congestus during IPHEX**

**Yajuan Duan et al.**

*Correspondence to:* Ana P. Barros ([barros@duke.edu](mailto:barros@duke.edu))

- [acp-19-1413-2019-supplement-title-page.pdf](#)
- Supplement
  - [ACPsupplement\\_revised.pdf](#)
  - [SA1\\_3Dwind\\_nearSurface.avi](#)
  - [SA2\\_3Dwind\\_1.5kmMSL.avi](#)
  - [SA3\\_3Dwind\\_CBH.avi](#)
  - [SA4\\_3Dwind\\_Leg1.avi](#)

The copyright of individual parts of the supplement might differ from the CC BY 4.0 License.
