# Supplementary material for: Understanding aerosol–cloud interactions through modeling the development of orographic cumulus congestus during IPHEx
Source: Copernicus journal article supplement (doi:10.5194/acp-19-1413-2019), 2019-02-04
Supplement: Supplementary file 3 [file acp-19-1413-2019-supplement.zip]

Archive with 7 entries (6 files):
- Supplement/
- Supplement/SA1_3Dwind_nearSurface.avi
- Supplement/ACPsupplement_revised.pdf
- Supplement/SA3_3Dwind_CBH.avi
- Supplement/SA4_3Dwind_Leg1.avi
- Supplement/SA2_3Dwind_1.5kmMSL.avi
- acp-19-1413-2019-supplement-title-page.pdf
